# Supplementary material for: Selectivity profile comparison for certain γ-butyrolactone and oxazolidinone-based ligands on a sigma 2 receptor over sigma 1: a molecular docking approach
Source: Royal Society of Chemistry journal article supplement (doi:10.1039/d2ra03497b), 2022-01-01
Supplement: d2ra03497b1.pdf [file d2ra03497b1.pdf]

## **Supporting Information**

**Selectivity profile comparison for certain  $\gamma$ -butyrolactone and oxazolidinone-based ligands on sigma 2 receptor over sigma 1: A molecular docking approach**

## Synthetic procedure

*Synthesis of  $\gamma$ -butyrolactones:*  $\gamma$ -butyrolactones (**3**) are prepared according to the method described in **Scheme 1**. The known tosylate (**1**) is reacted with a variety of amine (**2**) by refluxing in THF to provide the desired product (**3**).

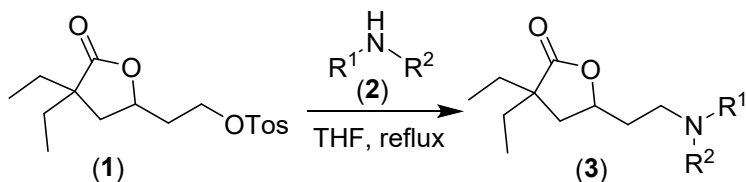

**Scheme 1.** General protocol for the synthesis of  $\gamma$ -butyrolactone derivatives.<sup>1</sup>

*Synthesis of Oxazolidinones:* Oxazolidinones (**8**) were prepared according to the methods described in **Scheme 2**. Epibromohydrin (**4a**) is reacted with an amine (**5**) in the presence of K<sub>2</sub>CO<sub>3</sub> in methanol to provide (**6**). Alternatively, Glycidol (**4b**) is reacted with amine (**5**) at 90 °C and the resulting product is reacted with diethyl carbonate in the presence of sodium methoxide and refluxing in methanol to provide (**6**). Conversion of (**6**) to the corresponding tosylate (pTosCl, NEt<sub>3</sub>, THF), followed by displacement of the leaving group with an amine (**7**) provided the final target compounds (**8**).

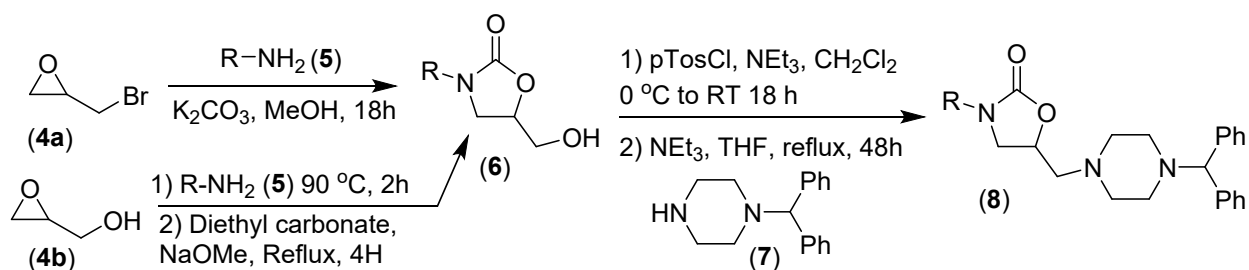

**Scheme 2.** General protocol for the synthesis of oxazolidinones.<sup>2</sup>

## References

1. Blass BE, Gao R, Blattner KM, Gordon JC, Pippin DA, Canney DJ. Synthesis and evaluation of novel, selective, functionalized  $\gamma$ -butyrolactones as sigma-2 ligands. *Medicinal Chemistry Research*. 2022; 31(2):337-349. DOI: 10.1007/s00044-021-02831-5.
2. Blass BE, Bhandare RR, Canney DJ. Discovery of oxazolidinone-based heterocycles as subtype selective sigma-2 ligands. *Medicinal Chemistry Research*. 2022, 31(3):416-425. DOI: 10.1007/s00044-022-02848-4.

## Library of compounds

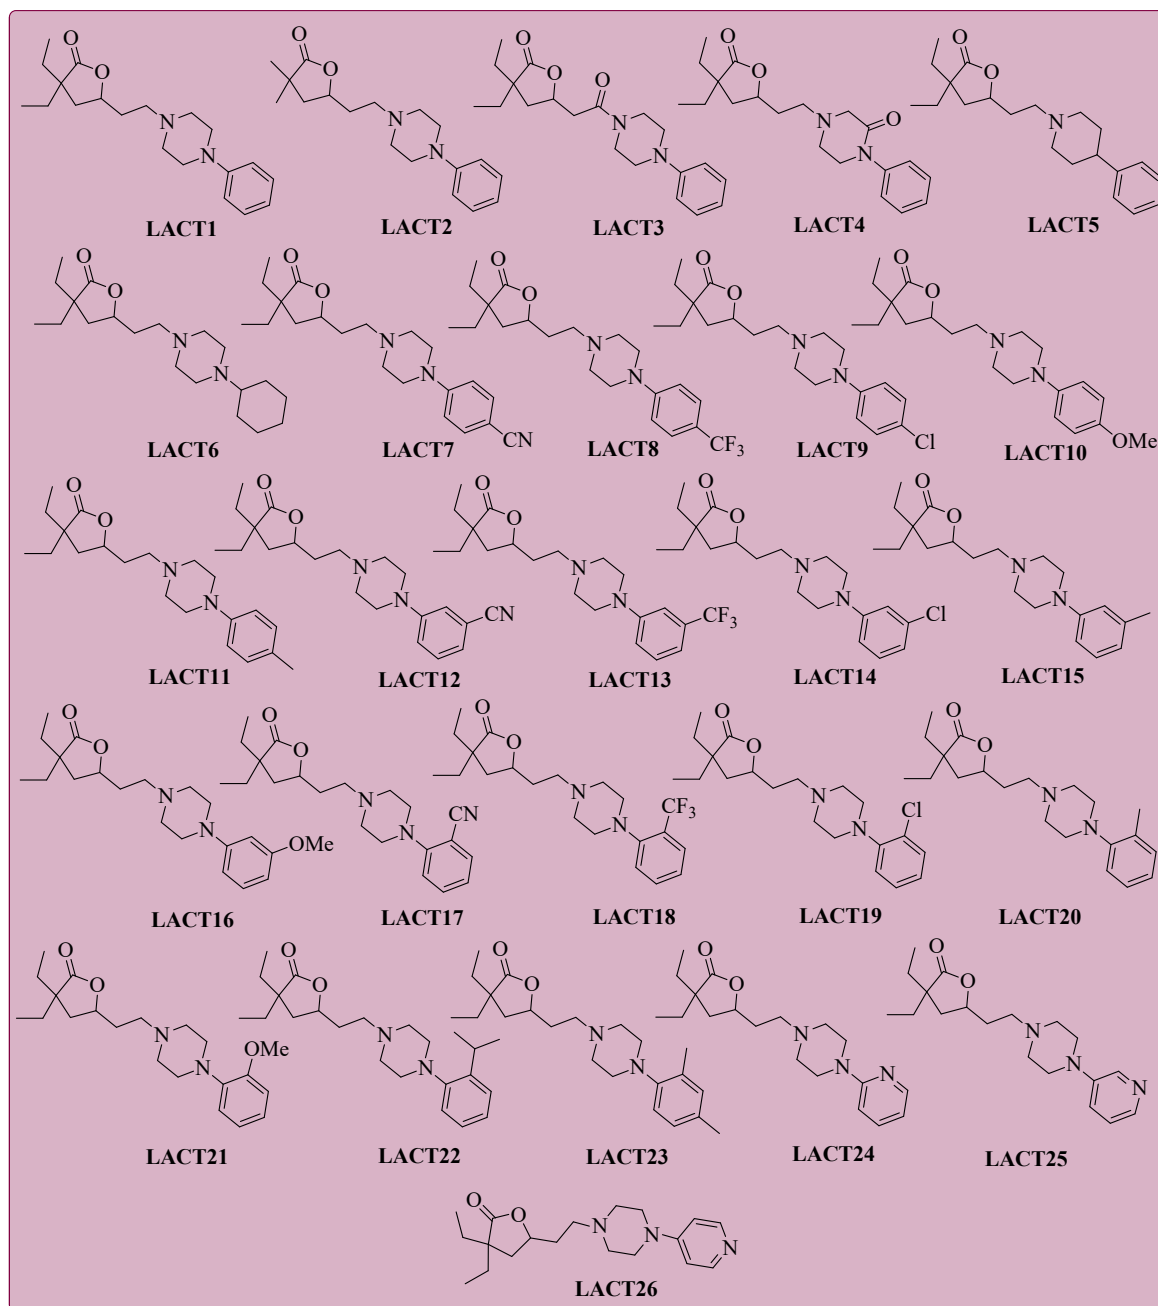

Figure S1A. Library of compounds with  $\gamma$ -butyrolactone scaffold.

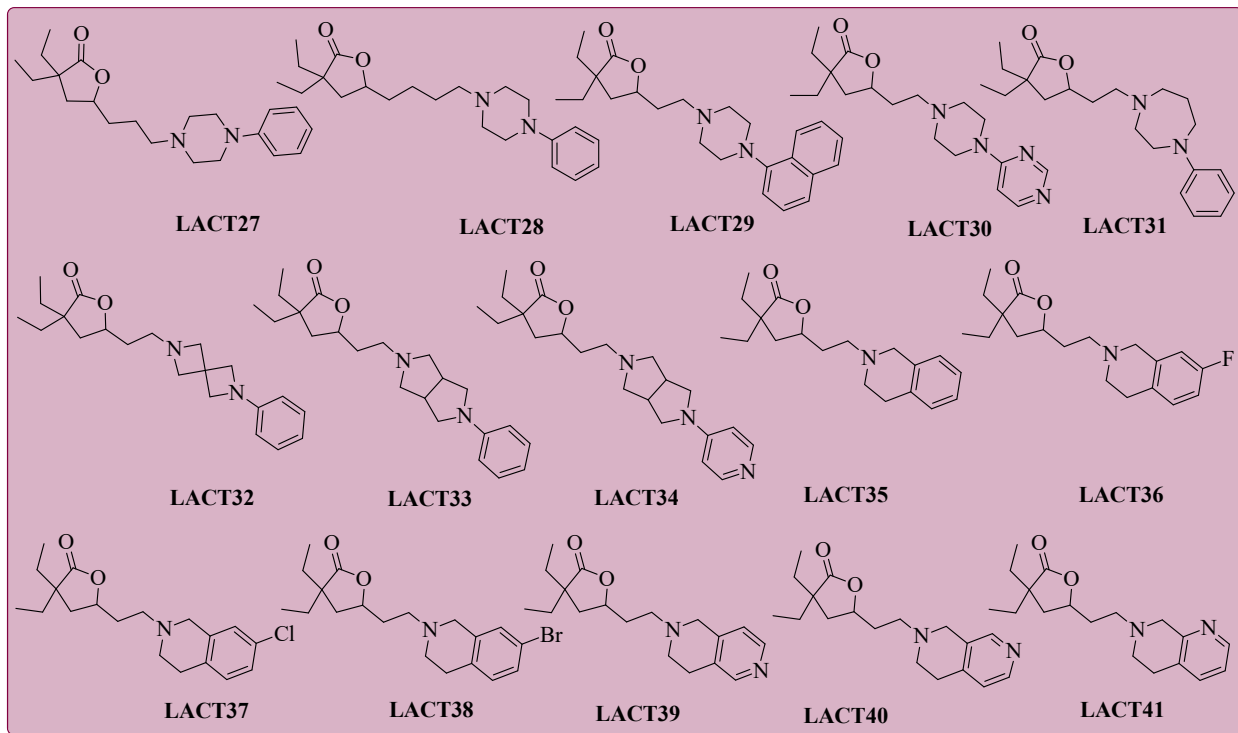

**Figure S1B.** Library of compounds with  $\gamma$ -butyrolactone scaffold.

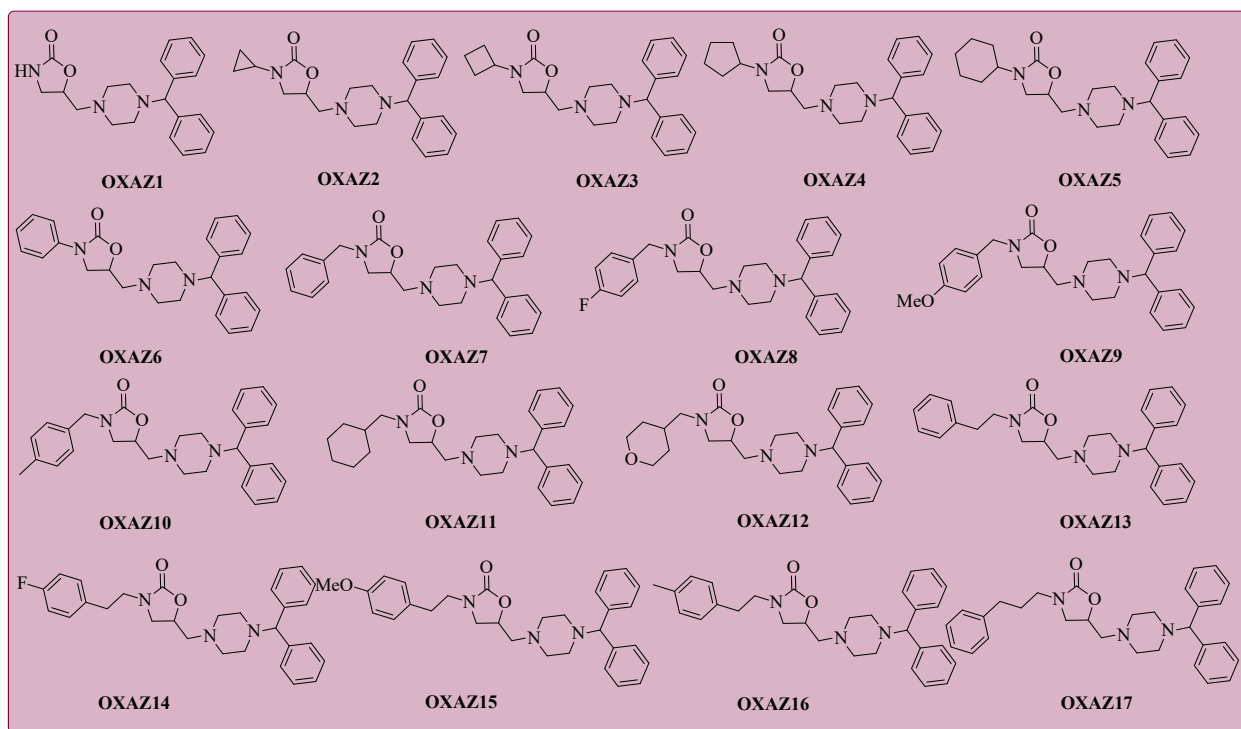

**Figure S2.** Library of compounds with oxazolidinone scaffold.

## Molecular Docking:

**Table S1.** GLIDE docking score for certain  $\gamma$ -butyrolactone and oxazolidinone-based ligands at the active sites of sigma intracellular receptor 1 and 2 ( $\sigma_1$  and  $\sigma_2$ ).

| S.no | Ligand ID | Receptor Name | Ki (nM) | Docking Score | Interactions |                |                                                                                                                                                           |
|------|-----------|---------------|---------|---------------|--------------|----------------|-----------------------------------------------------------------------------------------------------------------------------------------------------------|
|      |           |               |         |               | H-bonds      | Pi-Pi stacking | Hydrophobic                                                                                                                                               |
| 1    | LACT1     | $\sigma_1$    | 138     | -5.304        | -            | Tyr103         | Val84, Trp89, Met93, Leu95, Ala98, Tyr103, Leu105, Phe107, Tyr120, Ile124, Phe133, Val162, Trp164, Met170, Ile178, Leu182, Ala185, Tyr206                 |
|      |           | $\sigma_2$    | 82      | -5.295        | Asp29, Glu73 | Tyr50          | Ile24, Met28, Trp49, Tyr50, Leu59, Phe66, Phe69, Leu70, Phe81, Leu111, Ile114, Val146, Tyr147, Tyr150                                                     |
| 2    | LACT2     | $\sigma_1$    | 279     | -4.296        | Glu172       | -              | Val84, Trp89, Met93, Leu95, Ala98, Tyr103, Leu105, Tyr120, Ile124, Phe133, Val162, Trp164, Ile178, Leu182, Phe184, Ala185, Tyr206                         |
|      |           | $\sigma_2$    | 753     | -5.728        | Asp29        | -              | Ile24, Met28, Trp49, Tyr50, Leu59, Phe66, Phe69, Leu70, Leu111, Ile114, Val146, Tyr147, Tyr150                                                            |
| 3    | LACT3     | $\sigma_1$    | 10000   | -4.289        | -            | Tyr103         | Val84, Trp89, Met93, Leu95, Ala98, Tyr103, Leu105, Phe107, Tyr120, Ile124, Phe133, Val162, Trp164, Met170, Ile178, Leu182, Ala185, Tyr206                 |
|      |           | $\sigma_2$    | 10000   | -3.872        | -            | Tyr50          | Ile24, Met28, Trp49, Tyr50, Leu59, Phe66, Phe69, Leu70, Leu111, Ile114, Val146, Tyr147, Tyr150                                                            |
| 4    | LACT4     | $\sigma_1$    | 10000   | -6.182        | -            | Tyr103         | Val84, Trp89, Met93, Leu95, Ala98, Tyr103, Leu105, Phe107, Tyr120, Ile124, Phe133, Val152, Val162, Trp164, Met170, Ile178, Leu182, Phe184, Ala185, Tyr206 |
|      |           | $\sigma_2$    | 5289    | -5.359        | Asp29        | -              | Ile24, Met28, Tyr50, Leu59, Phe66, Phe69, Leu70, Tyr103, Leu111, Ile114, Val146, Tyr147, Tyr150                                                           |
| 5    | LACT5     | $\sigma_1$    | 2.7     | -6.815        | -            | Tyr103, Tyr206 | Val84, Trp89, Met93, Leu95, Ala98, Tyr103, Leu105, Phe107, Tyr120, Ile124, Phe133, Val162, Trp164, Met170, Ile178, Leu182, Phe184, Ala185, Tyr206         |
|      |           | $\sigma_2$    | 6.4     | -8.732        | -            | -              | Ile24, Met28, Trp49, Tyr50, Leu59, Phe66, Phe69, Leu70, Leu111, Val146, Tyr147,                                                                           |

|    |        |            |       |        |              |        |                                                                                                                                                   |
|----|--------|------------|-------|--------|--------------|--------|---------------------------------------------------------------------------------------------------------------------------------------------------|
|    |        |            |       |        |              |        | Tyr150                                                                                                                                            |
| 6  | LACT6  | $\sigma_1$ | 26    | -7.841 | Glu172       | -      | Val84, Trp89, Met93, Leu95, Ala98, Tyr103, Leu105, Phe107, Tyr120, Ile124, Phe133, Val162, Trp164, Ile178, Leu182, Phe184, Ala185, Tyr206         |
|    |        | $\sigma_2$ | 5.4   | -7.931 | -            | -      | Ile24, Met28, Leu46, Trp49, Tyr50, Phe54, Leu59, Phe66, Phe69, Leu70, Leu111, Ile114, Val146, Tyr147, Tyr150                                      |
| 7  | LACT7  | $\sigma_1$ | 98    | -6.753 | -            | -      | Val84, Trp89, Met93, Leu95, Ala98, Tyr103, Leu105, Phe107, Tyr120, Ile124, Phe133, Val162, Trp164, Met170, Ile178, Leu182, Phe184, Ala185, Tyr206 |
|    |        | $\sigma_2$ | 34    | -7.877 | -            | -      | Ile24, Met28, Trp49, Tyr50, Phe54, Leu59, Phe66, Phe69, Leu70, Leu111, Ile114, Val146, Tyr147, Tyr150                                             |
| 8  | LACT8  | $\sigma_1$ | 14    | -8.024 | -            | Tyr103 | Val84, Trp89, Met93, Leu95, Ala98, Tyr103, Leu105, Phe107, Tyr120, Ile124, Phe133, Val162, Trp164, Met170, Ile178, Leu182, Phe184, Ala185, Tyr206 |
|    |        | $\sigma_2$ | 7.3   | -8.037 | -            | -      | Ile24, Met28, Leu46, Trp49, Tyr50, Phe54, Leu59, Phe66, Phe69, Leu70, Leu111, Ile114, Val146, Tyr147, Tyr150                                      |
| 9  | LACT9  | $\sigma_1$ | 17    | -7.180 | -            | Leu182 | Val84, Trp89, Met93, Leu95, Ala98, Tyr103, Leu105, Phe107, Tyr120, Ile124, Phe133, Val162, Trp164, Met170, Ile178, Leu182, Phe184, Ala185, Tyr206 |
|    |        | $\sigma_2$ | 12    | -7.069 | Val146       | -      | Ile24, Met28, Leu46, Trp49, Tyr50, Phe54, Leu59, Phe66, Phe69, Leu70, Leu111, Val146, Tyr147, Tyr150                                              |
| 10 | LACT10 | $\sigma_1$ | 79    | -7.288 | Glu172       | His154 | Val84, Trp89, Met93, Leu95, Ala98, Tyr103, Leu105, Tyr120, Ile124, Phe133, Val152, Val162, Trp164, Ile178, Leu182, Phe184, Ala185, Tyr206         |
|    |        | $\sigma_2$ | 53    | -7.456 | Asp29, Glu73 | -      | Ile24, Met28, Trp49, Tyr50, Phe54, Leu59, Phe66, Phe69, Leu70, Phe81, Leu111, Ile114, Val146, Tyr147, Tyr150                                      |
| 11 | LACT11 | $\sigma_1$ | 10000 | -5.705 | -            | Tyr103 | Val84, Trp89, Met93, Leu95, Ala98, Tyr103, Leu105, Phe107, Tyr120, Ile124, Phe133, Val162, Trp164, Met170, Ile178, Leu182, Ala185, Tyr206         |
|    |        | $\sigma_2$ | 14    | -6.850 | -            | Tyr50  | Ile24, Met28, Trp49, Tyr50, Leu59, Phe66, Phe69, Leu70, Cys72, Leu111, Ile114, Val146, Tyr147, Tyr150                                             |
| 12 | LACT12 | $\sigma_1$ | 159   | -7.956 | -            | -      | Val84, Trp89, Met93, Leu95, Ala98, Tyr103, Leu105, Phe107, Tyr120, Ile124, Phe133, Val162, Trp164, Met170, Ile178,                                |

|    |        |            |     |        |              |        |                                                                                                                                                   |
|----|--------|------------|-----|--------|--------------|--------|---------------------------------------------------------------------------------------------------------------------------------------------------|
|    |        |            |     |        |              |        | Leu182, Ala185, Tyr206                                                                                                                            |
|    |        | $\sigma_2$ | 46  | -8.157 | Glu73        | -      | Ile24, Met28, Tyr50, Leu59, Phe66, Phe69, Leu70, Tyr103, Leu111, Ile114, Val146, Tyr147, Tyr150                                                   |
| 13 | LACT13 | $\sigma_1$ | 65  | -6.752 | Glu172       | -      | Val84, Trp89, Met93, Leu95, Ala98, Tyr103, Leu105, Phe107, Tyr120, Ile124, Phe133, Val162, Trp164, Met170, Ile178, Leu182, Ala185, Tyr206         |
|    |        | $\sigma_2$ | 12  | -7.365 | Asp29        | -      | Ile24, Met28, Trp49, Tyr50, Phe54, Leu59, Phe66, Phe69, Leu70, Tyr103, Leu111, Ile114, Val146, Tyr147, Tyr150                                     |
| 14 | LACT14 | $\sigma_1$ | 84  | -7.919 | Glu172       | -      | Val84, Trp89, Met93, Leu95, Ala98, Tyr103, Leu105, Tyr120, Ile124, Phe133, Val162, Trp164, Ile178, Leu182, Phe184, Ala185, Tyr206                 |
|    |        | $\sigma_2$ | 9.9 | -8.797 | Asp29, Glu73 | -      | Ile24, Met28, Trp49, Tyr50, Leu59, Phe66, Phe69, Leu70, Phe81, Leu111, Ile114, Val146, Tyr147, Tyr150                                             |
| 15 | LACT15 | $\sigma_1$ | 59  | -6.452 | -            | -      | Val84, Trp89, Met93, Leu95, Ala98, Tyr103, Leu105, Phe107, Tyr120, Ile124, Phe133, Val162, Trp164, Met170, Ile178, Leu182, Phe184, Ala185, Tyr206 |
|    |        | $\sigma_2$ | 30  | -6.381 | Asp29        | -      | Ile24, Met28, Trp49, Tyr50, Phe54, Leu59, Phe66, Phe69, Leu70, Leu111, Ile114, Val146, Tyr147, Tyr150                                             |
| 16 | LACT16 | $\sigma_1$ | 169 | -7.972 | Glu172       | -      | Val84, Trp89, Met93, Leu95, Ala98, Tyr103, Leu105, Tyr120, Ile124, Phe133, Val162, Trp164, Ile178, Leu182, Phe184, Ala185, Leu203, Tyr206         |
|    |        | $\sigma_2$ | 62  | -7.841 | Asp29        | -      | Ile24, Met28, Trp49, Tyr50, Leu59, Phe66, Phe69, Leu70, Leu111, Ile114, Val146, Tyr147, Tyr150                                                    |
| 17 | LACT17 | $\sigma_1$ | 351 | -8.027 | -            | Tyr103 | Val84, Trp89, Met93, Leu95, Ala98, Tyr103, Leu105, Phe107, Tyr120, Ile124, Phe133, Val162, Trp164, Met170, Ile178, Leu182, Phe184, Ala185, Tyr206 |
|    |        | $\sigma_2$ | 61  | -8.301 | Asp29        | -      | Ile24, Met28, Trp49, Tyr50, Phe54, Leu59, Phe66, Phe69, Leu70, Leu111, Ile114, Val146, Tyr147, Tyr150                                             |
| 18 | LACT18 | $\sigma_1$ | 67  | -6.495 | -            | -      | Val84, Trp89, Met93, Leu95, Ala98, Tyr103, Leu105, Phe107, Tyr120, Ile124, Phe133, Val162, Trp164, Met170, Ile178, Leu182, Phe184, Ala185, Tyr206 |
|    |        | $\sigma_2$ | 17  | -6.906 | Asp29        | -      | Ile24, Met28, Trp49, Tyr50, Leu59, Phe66, Phe69, Leu70, Leu111, Ile114, Val146, Tyr147, Tyr150                                                    |

|    |        |            |       |        |              |        |                                                                                                                                                                   |
|----|--------|------------|-------|--------|--------------|--------|-------------------------------------------------------------------------------------------------------------------------------------------------------------------|
| 19 | LACT19 | $\sigma_1$ | 35    | -6.988 | -            | Tyr103 | Val84, Trp89, Met93, Leu95, Ala98, Tyr103, Leu105, Phe107, Tyr120, Ile124, Phe133, Val162, Trp164, Met170, Ile178, Leu182, Phe184, Ala185, Tyr206                 |
|    |        | $\sigma_2$ | 7.0   | -7.780 | Asp29        | -      | Ile24, Met28, Trp49, Tyr50, Phe54, Leu59, Phe66, Phe69, Leu70, Leu111, Ile114, Val146, Tyr147, Tyr150                                                             |
| 20 | LACT20 | $\sigma_1$ | 36    | -5.385 | -            | -      | Val84, Ala86, Trp89, Met93, Leu95, Ala98, Tyr103, Leu105, Tyr120, Ile124, Phe133, Val162, Trp164, Ile178, Leu182, Phe184, Ala185, Tyr206                          |
|    |        | $\sigma_2$ | 9.3   | -6.343 | -            | -      | Ile24, Met28, Trp49, Tyr50, Phe54, Leu59, Phe66, Phe69, Leu70, Leu111, Ile114, Val146, Tyr147, Tyr150                                                             |
| 21 | LACT21 | $\sigma_1$ | 1168  | -5.681 | -            | -      | Val84, Ala86, Trp89, Met93, Leu95, Tyr103, Leu105, Phe107, Tyr120, Ile124, Phe133, Val162, Trp164, Met170, Ile178, Leu182, Phe184, Ala185, Tyr206                 |
|    |        | $\sigma_2$ | 44    | -7.550 | Asp29        | -      | Ile24, Met28, Trp49, Tyr50, Leu59, Phe66, Phe69, Leu70, Leu111, Ile114, Val146, Tyr147, Tyr150                                                                    |
| 22 | LACT22 | $\sigma_1$ | 195   | -4.693 | -            | -      | Val84, Trp89, Met93, Leu95, Ala98, Tyr103, Leu105, Phe107, Tyr120, Ile124, Phe133, Val152, Val162, Trp164, Met170, Ile178, Leu182, Phe184, Ala185, Leu186, Tyr206 |
|    |        | $\sigma_2$ | 5.9   | -7.891 | Asp29        | -      | Ile24, Met28, Trp49, Tyr50, Phe54, Leu59, Phe66, Leu70, Leu111, Ile114, Val146, Tyr147, Pro149, Tyr150                                                            |
| 23 | LACT23 | $\sigma_1$ | 10    | -8.279 | -            | Tyr103 | Val84, Trp89, Met93, Leu95, Ala98, Tyr103, Leu105, Phe107, Tyr120, Ile124, Phe133, Val152, Val162, Trp164, Met170, Ile178, Leu182, Ala185, Leu186, Tyr206         |
|    |        | $\sigma_2$ | 9.2   | -8.254 | Asp29, Glu73 | -      | Ile24, Met28, Trp49, Tyr50, Phe54, Leu59, Phe66, Phe69, Leu70, Tyr103, Leu111, Ile114, Val146, Tyr147, Tyr150                                                     |
| 24 | LACT24 | $\sigma_1$ | 1499  | -5.811 | Glu172       | -      | Val84, Trp89, Met93, Leu95, Ala98, Tyr103, Leu105, Tyr120, Ile124, Phe133, Val162, Trp164, Ile178, Leu182, Phe184, Ala185, Tyr206                                 |
|    |        | $\sigma_2$ | 268   | -3.480 | -            | Tyr50  | Ile24, Met28, Trp49, Tyr50, Leu59, Phe66, Phe69, Leu70, Leu111, Ile114, Val146, Tyr147, Tyr150                                                                    |
| 25 | LACT25 | $\sigma_1$ | 10000 | -5.096 | -            | -      | Val84, Trp89, Met93, Leu95, Ala98, Tyr103, Leu105, Phe107, Tyr120, Ile124, Phe133, Val152, Val162, Trp164, Met170,                                                |



|    |        |            |       |        |                 |                   |                                                                                                                                                            |
|----|--------|------------|-------|--------|-----------------|-------------------|------------------------------------------------------------------------------------------------------------------------------------------------------------|
|    |        |            |       |        |                 |                   | Ile178, Leu182, Phe184, Ala185, Tyr206                                                                                                                     |
|    |        | $\sigma_2$ | 10000 | -5.856 | Asp29,<br>Glu73 | Tyr50             | Ile24, Met28, Trp49, Tyr50, Leu59, Phe66,<br>Phe69, Leu70, Leu111, Ile114, Val146,<br>Tyr147, Tyr150                                                       |
| 26 | LACT26 | $\sigma_1$ | 10000 | -4.983 | Glu172          | -                 | Val84, Trp89, Met93, Leu95, Ala98,<br>Tyr103, Leu105, Tyr120, Ile124, Phe133,<br>Val162, Trp164, Ile178, Leu182, Phe184,<br>Ala185, Tyr206                 |
|    |        | $\sigma_2$ | 142   | -7.914 | Asp29,<br>Glu73 | -                 | Ile24, Met28, Trp49, Tyr50, Phe54, Leu59,<br>Phe66, Phe69, Leu70, Leu111, Ile114,<br>Val146, Tyr147, Tyr150                                                |
| 27 | LACT27 | $\sigma_1$ | 31    | -6.769 | -               | Tyr103            | Val84, Trp89, Met93, Leu95, Ala98,<br>Tyr103, Leu105, Phe107, Tyr120, Ile124,<br>Phe133, Val162, Trp164, Ile178, Leu182,<br>Ala185, Tyr206                 |
|    |        | $\sigma_2$ | 7.7   | -7.487 | Val146          | -                 | Ile24, Met28, Trp49, Tyr50, Leu59, Phe66,<br>Phe69, Leu70, Leu111, Val146, Tyr147,<br>Tyr150                                                               |
| 28 | LACT28 | $\sigma_1$ | 5.5   | -7.111 | -               | Tyr103            | Val84, Trp89, Met93, Leu95, Ala98,<br>Tyr103, Leu105, Phe107, Tyr120, Ile124,<br>Phe133, Val152, Val162, Trp164, Ile178,<br>Leu182, Ala185, Tyr206         |
|    |        | $\sigma_2$ | 12    | -7.300 | Asp29           | -                 | Ile24, Met28, Trp49, Tyr50, Phe54, Leu59,<br>Phe66, Phe69, Leu70, Cys72, Leu111,<br>Ile114, Val146, Tyr147, Tyr150                                         |
| 29 | LACT29 | $\sigma_1$ | 2167  | -6.486 | Glu172          | Tyr103,<br>Tyr206 | Val84, Trp89, Met93, Leu95, Ala98,<br>Tyr103, Leu105, Tyr120, Ile124, Phe133,<br>Val152, Val162, Trp164, Ile178, Leu182,<br>Phe184, Ala185, Tyr206         |
|    |        | $\sigma_2$ | 32    | -7.915 | Asp29           | -                 | Ile24, Met28, Trp49, Tyr50, Leu59, Phe66,<br>Phe69, Leu70, Leu111, Ile114, Val146,<br>Tyr147, Tyr150                                                       |
| 30 | LACT30 | $\sigma_1$ | 1017  | -5.351 | Glu172          | -                 | Val84, Trp89, Met93, Leu95, Ala98,<br>Tyr103, Leu105, Tyr120, Ile124, Phe133,<br>Val162, Trp164, Ile178, Leu182, Phe184,<br>Ala185, Tyr206                 |
|    |        | $\sigma_2$ | 10000 | -5.404 | Asp29,<br>Glu73 | -                 | Ile24, Met28, Trp49, Tyr50, Leu59, Phe66,<br>Phe69, Leu70, Leu111, Ile114, Val146,<br>Tyr147, Tyr150                                                       |
| 31 | LACT31 | $\sigma_1$ | 17    | -6.752 | -               | -                 | Val84, Trp89, Met93, Leu95, Ala98,<br>Tyr103, Leu105, Phe107, Tyr120, Ile124,<br>Phe133, Val162, Trp164, Ile178, Leu182,<br>Phe184, Ala185, Leu203, Tyr206 |
|    |        | $\sigma_2$ | 6.8   | -9.046 | Asp29           | -                 | Ile24, Met28, Trp49, Tyr50, Phe54, Leu59,<br>Phe66, Phe69, Leu70, Leu111, Ile114,<br>Val146, Tyr147, Tyr150                                                |

|    |        |            |     |        |              |        |                                                                                                                                                   |
|----|--------|------------|-----|--------|--------------|--------|---------------------------------------------------------------------------------------------------------------------------------------------------|
| 32 | LACT32 | $\sigma_1$ | 12  | -8.088 | Glu172       | Phe133 | Val84, Trp89, Met93, Tyr103, Leu105, Phe107, Tyr120, Ile124, Phe133, Val152, Val153, Val162, Trp164, Ile178, Leu182, Phe184, Ala185               |
|    |        | $\sigma_2$ | 53  | -8.064 | Asp29        | -      | Ile24, Met28, Trp49, Tyr50, Leu59, Phe66, Phe69, Leu70, Leu111, Ile114, Val146, Tyr147, Tyr150                                                    |
| 33 | LACT33 | $\sigma_1$ | 31  | -7.978 | -            | Tyr103 | Val84, Trp89, Met93, Leu95, Ala98, Tyr103, Leu105, Phe107, Tyr120, Ile124, Phe133, Val162, Trp164, Ile178, Leu182, Phe184, Ala185, Tyr206         |
|    |        | $\sigma_2$ | 3.5 | -9.142 | Asp29        | -      | Ile24, Met28, Leu46, Trp49, Tyr50, Phe54, Leu59, Phe66, Phe69, Leu70, Leu111, Ile114, Val146, Tyr147, Tyr150                                      |
| 34 | LACT34 | $\sigma_1$ | 171 | -7.461 | Glu172       | Tyr206 | Val84, Trp89, Met93, Leu95, Ala98, Tyr103, Leu105, Phe107, Tyr120, Ile124, Phe133, Val162, Trp164, Met170, Ile178, Leu182, Phe184, Ala185, Tyr206 |
|    |        | $\sigma_2$ | 29  | -8.192 | Asp29, Gln77 | -      | Ile24, Met28, Leu46, Trp49, Tyr50, Phe54, Leu59, Phe66, Phe69, Leu70, Phe81, Tyr103, Leu111, Ile114, Val146, Tyr147, Tyr150                       |
| 35 | LACT35 | $\sigma_1$ | 125 | -7.416 | -            | His154 | Val84, Trp89, Met93, Leu95, Tyr103, Leu105, Phe107, Tyr120, Ile124, Phe133, Val162, Trp164, Ile178, Leu182, Phe184, Ala185, Leu186                |
|    |        | $\sigma_2$ | 6.1 | -10.62 | Asp29, Gln77 | -      | Ile24, Met28, Tyr50, Leu59, Phe66, Phe69, Leu70, Leu111, Ile114, Val146, Tyr147, Tyr150                                                           |
| 36 | LACT36 | $\sigma_1$ | 68  | -7.661 | -            | Tyr103 | Val84, Trp89, Met93, Leu95, Ala98, Tyr103, Leu105, Phe107, Tyr120, Ile124, Phe133, Val162, Trp164, Met170, Ile178, Leu182, Phe184, Ala185, Tyr206 |
|    |        | $\sigma_2$ | 7.4 | -9.377 | Asp29        | -      | Ile24, Met28, Trp49, Tyr50, Leu59, Phe66, Phe69, Leu70, Leu111, Ile114, Val146, Tyr147, Tyr150                                                    |
| 37 | LACT37 | $\sigma_1$ | 59  | -7.642 | -            | Tyr103 | Val84, Trp89, Met93, Leu95, Ala98, Tyr103, Leu105, Phe107, Tyr120, Ile124, Phe133, Val162, Trp164, Met170, Ile178, Leu182, Phe184, Ala185, Tyr206 |
|    |        | $\sigma_2$ | 2.8 | -9.880 | Asp29        | -      | Ile24, Met28, Trp49, Tyr50, Leu59, Phe66, Leu70, Leu111, Ile114, Val146, Tyr147, Tyr150                                                           |
| 38 | LACT38 | $\sigma_1$ | 4.7 | -8.107 | Glu172       | -      | Val84, Trp89, Met93, Leu95, Ala98, Tyr103, Leu105, Phe107, Tyr120, Ile124, Phe133, Val162, Trp164, Met170, Ile178,                                |

|    |        |            |       |        |              |        |                                                                                                                                                   |
|----|--------|------------|-------|--------|--------------|--------|---------------------------------------------------------------------------------------------------------------------------------------------------|
|    |        |            |       |        |              |        | Leu182, Phe184, Ala185, Tyr206                                                                                                                    |
|    |        | $\sigma_2$ | 8.9   | -9.323 | Asp29        | -      | Ile24, Met28, Trp49, Tyr50, Phe54, Leu59, Phe66, Phe69, Leu70, Leu111, Ile114, Val146, Tyr147, Tyr150                                             |
| 39 | LACT39 | $\sigma_1$ | 10000 | -8.482 | Glu172       | -      | Val84, Trp89, Met93, Leu95, Tyr103, Leu105, Phe107, Tyr120, Ile124, Phe133, Val162, Trp164, Ile178, Leu182, Phe184, Ala185, Tyr206                |
|    |        | $\sigma_2$ | 10000 | -8.121 | Asp29        | -      | Ile24, Met28, Tyr50, Leu59, Phe66, Phe69, Leu70, Leu111, Ile114, Val146, Tyr147, Tyr150                                                           |
| 40 | LACT40 | $\sigma_1$ | 1156  | -7.113 | Glu172       | -      | Val84, Trp89, Met93, Leu95, Ala98, Tyr103, Leu105, Phe107, Tyr120, Ile124, Phe133, Val162, Trp164, Ile178, Leu182, Ala185, Tyr206                 |
|    |        | $\sigma_2$ | 10000 | -7.241 | Asp29        | -      | Ile24, Met28, Tyr50, Leu59, Phe66, Phe69, Leu70, Cys72, Leu111, Ile114, Val146, Tyr147, Tyr150                                                    |
| 41 | LACT41 | $\sigma_1$ | 10000 | -7.582 | Glu172       | -      | Val84, Trp89, Met93, Leu95, Ala98, Tyr103, Leu105, Phe107, Tyr120, Ile124, Phe133, Val162, Trp164, Ile178, Leu182, Phe184, Ala185, Tyr206         |
|    |        | $\sigma_2$ | 277   | -9.292 | Asp29        | -      | Ile24, Met28, Tyr50, Leu59, Phe66, Phe69, Leu70, Leu111, Ile114, Val146, Tyr147, Tyr150                                                           |
| 42 | OXAZ1  | $\sigma_1$ | 10000 | -3.314 | Tyr120       | Tyr103 | Val84, Trp89, Met93, Leu95, Ala98, Tyr103, Leu105, Phe107, Tyr120, Ile124, Phe133, Val162, Trp164, Ile178, Leu182, Phe184, Ala185, Leu186, Tyr206 |
|    |        | $\sigma_2$ | 10000 | -2.254 | Asp29        | Tyr50  | Ile24, Met28, Trp49, Tyr50, Phe54, Leu59, Phe66, Leu70, Leu111, Ile114, Val146, Tyr147, Pro149, Tyr150                                            |
| 43 | OXAZ2  | $\sigma_1$ | 10000 | -5.445 | -            | Tyr103 | Val84, Trp89, Met93, Leu95, Ala98, Tyr103, Leu105, Tyr120, Ile124, Phe133, Val152, Val162, Trp164, Ile178, Leu182, Phe184, Ala185, Leu186, Tyr206 |
|    |        | $\sigma_2$ | 119   | -7.113 | Asp29        | Tyr50  | Ile24, Met28, Trp49, Tyr50, Leu59, Phe66, Leu70, Leu111, Ile114, Val146, Tyr147, Pro149, Tyr150                                                   |
| 44 | OXAZ3  | $\sigma_1$ | 10000 | ND     | -            | -      | -                                                                                                                                                 |
|    |        | $\sigma_2$ | 465   | -7.708 | Asp29, Glu73 | Phe54  | Ile24, Met28, Trp49, Tyr50, Phe54, Leu59, Phe66, Phe69, Leu70, Leu111, Ile114, Val146, Tyr147, Pro149, Tyr150                                     |
| 45 | OXAZ4  | $\sigma_1$ | 10000 | ND     | -            | -      | -                                                                                                                                                 |
|    |        | $\sigma_2$ | 206   | -7.627 | Asp29        | Phe54  | Ile24, Met28, Trp49, Tyr50, Phe54, Leu59, Phe66, Leu70, Phe81, Tyr103, Leu111,                                                                    |

|    |        |            |       |        |              |                |                                                                                                                                                   |
|----|--------|------------|-------|--------|--------------|----------------|---------------------------------------------------------------------------------------------------------------------------------------------------|
|    |        |            |       |        |              |                | Ile114, Val146, Tyr147, Pro149, Tyr150                                                                                                            |
| 46 | OXAZ5  | $\sigma_1$ | 10000 | -4.569 | -            | Tyr103, Tyr206 | Val84, Trp89, Met93, Leu95, Ala98, Tyr103, Leu105, Tyr120, Ile124, Phe133, Val152, Val162, Trp164, Ile178, Leu182, Phe184, Ala185, Leu186, Tyr206 |
|    |        | $\sigma_2$ | 530   | -6.371 | -            | -              | Ile24, Met28, Leu46, Trp49, Tyr50, Phe54, Leu59, Phe66, Phe69, Leu70, Phe81, Tyr103, Leu111, Ile114, Val146, Tyr147, Tyr150                       |
| 47 | OXAZ6  | $\sigma_1$ | 10000 | ND     | -            | -              | -                                                                                                                                                 |
|    |        | $\sigma_2$ | 192   | -7.609 | Asp29        |                | Ile24, Met28, Trp49, Tyr50, Phe54, Leu59, Phe66, Phe69, Leu70, Leu111, Ile114, Val146, Tyr147, Pro149, Tyr150                                     |
| 48 | OXAZ7  | $\sigma_1$ | 10000 | ND     | -            | -              | -                                                                                                                                                 |
|    |        | $\sigma_2$ | 91    | -8.164 | Asp29        | -              | Ile24, Met28, Leu46, Trp49, Tyr50, Phe54, Leu59, Phe66, Phe69, Leu70, Leu111, Ile114, Val146, Tyr147, Tyr150                                      |
| 49 | OXAZ8  | $\sigma_1$ | 2847  | -1.104 | -            | Trp121         | Tyr120, Trp121, Ala183, Phe184, Ala187, Phe191                                                                                                    |
|    |        | $\sigma_2$ | 36    | -10.15 | -            | -              | Ile24, Met28, Leu46, Trp49, Tyr50, Phe54, Leu59, Phe66, Phe69, Leu70, Leu111, Ile114, Val146, Tyr147, Tyr150                                      |
| 50 | OXAZ9  | $\sigma_1$ | 10000 | -1.683 | Arg119       | His116         | Tyr120, Trp121, Trp136, Ala159, Ala161, Ala183, Phe184, Ala187                                                                                    |
|    |        | $\sigma_2$ | 10000 | -6.505 | Asp29, Gln77 | -              | Ile24, Met28, Leu46, Trp49, Tyr50, Leu59, Phe66, Phe69, Leu70, Cys72, Tyr103, Leu111, Ile114, Val146, Tyr147, Pro149, Tyr150                      |
| 51 | OXAZ10 | $\sigma_1$ | 10000 | -1.663 | Arg119       | His116         | Tyr120, Trp121, Trp136, Ala159, Ala161, Ala183, Phe184, Ala187                                                                                    |
|    |        | $\sigma_2$ | 10000 | -6.183 | -            | -              | Ile24, Met28, Leu46, Trp49, Tyr50, Phe54, Leu59, Phe66, Phe69, Leu70, Leu111, Ile114, Val146, Tyr147, Tyr150                                      |
| 52 | OXAZ11 | $\sigma_1$ | 10000 | ND     | -            | -              | -                                                                                                                                                 |
|    |        | $\sigma_2$ | 1379  | -6.229 | -            | -              | Pro23, Ile24, Phe27, Met28, Leu46, Trp49, Tyr50, Phe54, Leu59, Phe66, Phe69, Leu70, Phe81, Tyr103, Leu111, Ile114, Val146, Tyr147, Tyr150         |
| 53 | OXAZ12 | $\sigma_1$ | 10000 | -1.324 | Gly87        | Trp121         | Ala86, Tyr120, Trp121, Ala183, Phe184, Ala187                                                                                                     |
|    |        | $\sigma_2$ | 2428  | -5.336 | Asp29        | Phe54          | Ile24, Met28, Trp49, Tyr50, Phe54, Leu59, Phe66, Phe69, Phe81, Tyr103, Leu111, Ile114, Val146, Tyr147, Pro149, Tyr150                             |
| 54 | OXAZ13 | $\sigma_1$ | 10000 | ND     | -            | -              | -                                                                                                                                                 |
|    |        | $\sigma_2$ | 49    | -8.832 | Asp29        | Tyr150         | Ile24, Met28, Trp49, Tyr50, Phe54, Leu59, Phe66, Phe69, Leu70, Leu111, Ile114,                                                                    |

|                                   |        |            |       |        |        |        |                                                                                                                      |
|-----------------------------------|--------|------------|-------|--------|--------|--------|----------------------------------------------------------------------------------------------------------------------|
|                                   |        |            |       |        |        |        | Vall46, Tyr147, Pro149, Tyr150                                                                                       |
| 55                                | OXAZ14 | $\sigma_1$ | 10000 | -1.068 | -      | Trp121 | Tyr120, Trp121, Ala183, Phe184                                                                                       |
|                                   |        | $\sigma_2$ | 2338  | -4.268 | -      | -      | Ile24, Met28, Leu46, Trp49, Tyr50, Leu59, Phe66, Phe69, Leu70, Leu111, Ile114, Vall46, Tyr147, Tyr150                |
| 56                                | OXAZ15 | $\sigma_1$ | 10000 | -1.517 | Arg119 | -      | Tyr120, Trp121, Ala159, Ala183, Phe184, Ala187                                                                       |
|                                   |        | $\sigma_2$ | 10000 | -6.248 | Asp29  | -      | Ile24, Met28, Leu46, Trp49, Tyr50, Leu59, Phe66, Phe69, Leu70, Tyr103, Leu111, Ile114, Vall46, Tyr147, Tyr150        |
| 57                                | OXAZ16 | $\sigma_1$ | 10000 | -0.375 | -      | -      | Trp121, Ala183, Phe184, Ala187                                                                                       |
|                                   |        | $\sigma_2$ | 10000 | -3.750 | -      | -      | Ile24, Met28, Trp49, Tyr50, Phe54, Leu59, Phe66, Phe69, Leu70, Cys72, Leu111, Ile114, Vall46, Tyr147, Pro149, Tyr150 |
| 58                                | OXAZ17 | $\sigma_1$ | 10000 | -1.135 | -      | Trp121 | Tyr120, Trp121, Ala183, Phe184, Ala187                                                                               |
|                                   |        | $\sigma_2$ | 1245  | -6.506 | Asp29  | -      | Ile24, Met28, Trp49, Tyr50, Phe54, Leu59, Phe66, Phe69, Leu70, Phe81, Leu111, Ile114, Vall46, Tyr147, Pro149, Tyr150 |
| ND# Not docked at the active site |        |            |       |        |        |        |                                                                                                                      |
